# Supplementary material for: Availability of the Molecular Switch XylR Controls Phenotypic Heterogeneity and Lag Duration during Escherichia coli Adaptation from Glucose to Xylose
Source: PubMed Central journal article supplement (PMC8534289; doi:10.1128/mbio.02938-20), 2020-12-22
Supplement: mbio.02938-20-sf001.pdf [file mbio.02938-20-sf001.pdf]

|                | Median signal intensity mRFP1<br>(u.a.f) | Median signal intensity mTagBFP<br>(u.a.f) |
|----------------|------------------------------------------|--------------------------------------------|
| Glucose medium | 3.55                                     | 47.04                                      |
| Xylose medium  | 120.00                                   | 44.47                                      |

**Figure S1:** Median fluorescence intensity of *E. coli* BW25113 strain carrying the dual fluorescence plasmid pSB1C3  $P_{xylA}$ -mRFP1  $P_{ihfBA}$ -mTagBFP in M9 glucose medium versus in M9 xylose medium. Fluorescence was measured by cytometry during the exponential growth phase. The Y2-A canal was used to quantify mRFP1 fluorescence intensity (inducible on xylose) and the V1-A canal to quantify mTagBFP fluorescence intensity (constitutive).
