# Supplementary material for: Availability of the Molecular Switch XylR Controls Phenotypic Heterogeneity and Lag Duration during Escherichia coli Adaptation from Glucose to Xylose
Source: PubMed Central journal article supplement (PMC8534289; doi:10.1128/mbio.02938-20), 2020-12-22
Supplement: mbio.02938-20-sf004.pdf [file mbio.02938-20-sf004.pdf]

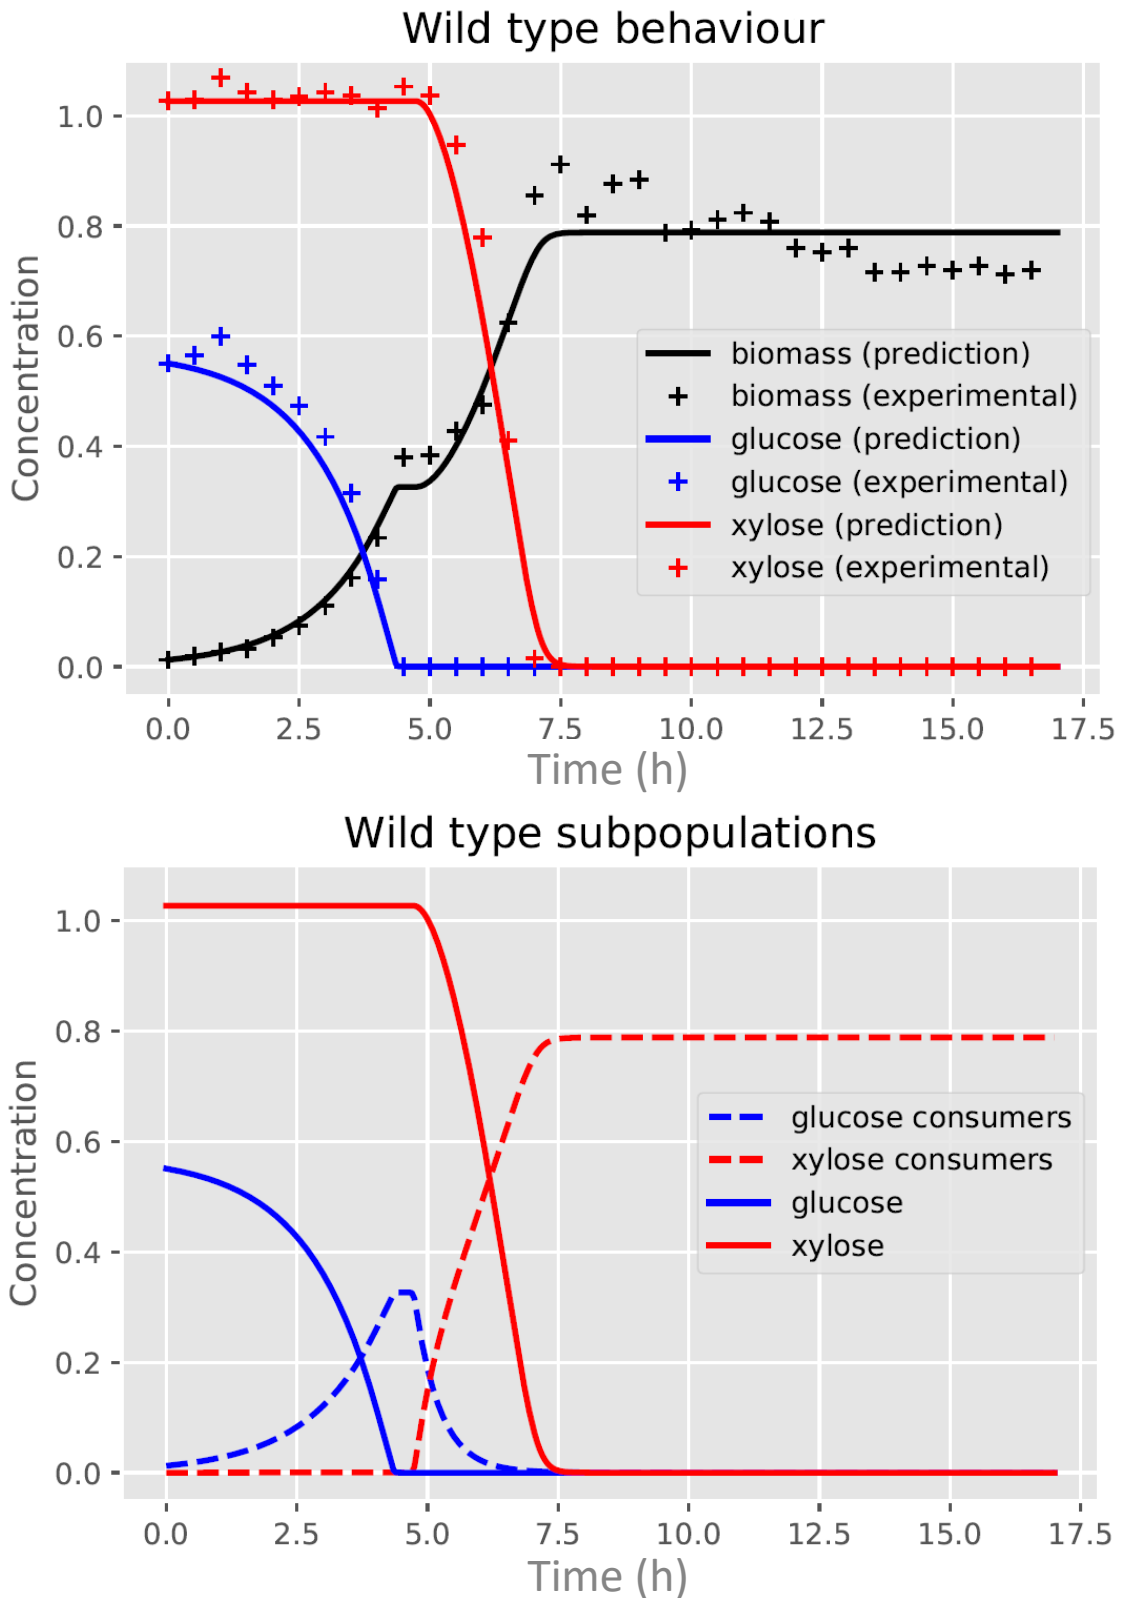

**Figure S4:** Behavior of wild type strain BW25113 on a glucose-xylose mix. Experimental and prediction data are presented for biomass concentration (g.L<sup>-1</sup>) and substrates (g.L<sup>-1</sup>) in the top row and prediction data for subpopulations in the bottom row of graphs.
