# Supplementary material for: Availability of the Molecular Switch XylR Controls Phenotypic Heterogeneity and Lag Duration during Escherichia coli Adaptation from Glucose to Xylose
Source: PubMed Central journal article supplement (PMC8534289; doi:10.1128/mbio.02938-20), 2020-12-22
Supplement: mbio.02938-20-sf007.pdf [file mbio.02938-20-sf007.pdf]

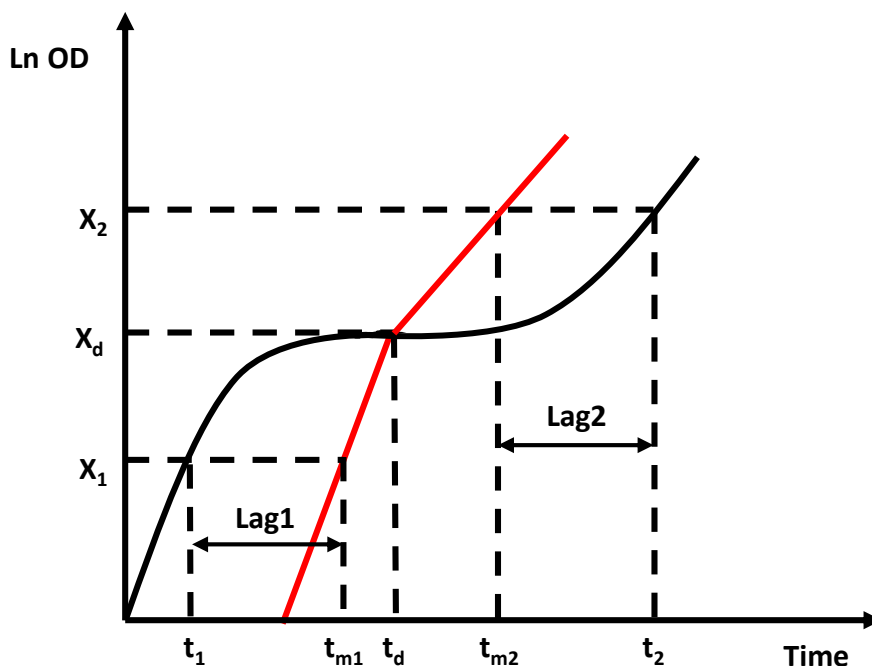

### Figure S7: Demonstration of the diauxic lag formula

Here we consider the diauxic lag as the time lost in comparison to hypothetical growth where a first exponential phase is immediately followed by a second exponential phase (in red in the figure).

$X_d$ : a biomass point reached during the diauxic lag.

$\mu_{max1}$ : the maximal growth rate on the first substrate.

$\mu_{max2}$ : the maximal growth rate on the second substrate.

$X_1$ : biomass reached during the exponential growth on the first substrate at time  $t_1$  or at time  $t_{m1}$  if the growth rate was theoretically maximal until  $t_d$

$X_2$ : biomass reached during the exponential growth on the second substrate at time  $t_2$  or at time  $t_{m2}$  if the growth rate was theoretically maximal from  $t_d$ .

The diauxic lag is thus equal to lag1 ( $t_{m1}-t_1$ ) for the glucose growth phase plus lag2 ( $t_2 - t_{m2}$ ) for the xylose growth phase. Based on the formula proposed by Enjalbert (Enjalbert et al., 2015), we demonstrated the diauxic lag calculation as followed:

- Demonstration for lag1

$$\mu_{max1} = \ln(X_d/X_1)/(t_d-t_{m1}), \text{ thus } (t_d-t_{m1}) = \ln(X_d/X_1)/\mu_{max1}$$

$$\text{Given that } \text{Lag1} = (t_{m1}-t_1) = t_d-(t_d-t_{m1})-t_1$$

$$\text{Thus } (t_{m1}-t_1) = t_d-(\ln(X_d/X_1)/\mu_{max1}) - t_1$$

- Demonstration for lag2

$$\mu_{max2} = \ln(X_2/X_d)/(t_{m2}-t_d), \text{ thus } (t_{m2}-t_d) = \ln(X_2/X_d)/\mu_{max2}$$

$$\text{Given that } \text{lag2} = (t_2-t_{m2}) = (t_2-t_d)-(t_{m2}-t_d)$$

$$\text{Thus } (t_2-t_{m2}) = (t_2-t_d)-(\ln(X_2/X_d)/\mu_{max2})$$

Since diauxic lag = lag1+lag2

$$\text{Diauxic lag} = t_d-(\ln(X_d/X_1)/\mu_{max1})-t_1+(t_2-t_d)-(\ln(X_2/X_d)/\mu_{max2})$$

$$\text{So that Diauxic lag} = t_2-t_1-(\ln(X_d/X_1)/\mu_{max1})-(\ln(X_2/X_d)/\mu_{max2})$$
